# Supplementary material for: Enteric Pathogen Survival Varies Substantially in Irrigation Water from Belgian Lettuce Producers
Source: PubMed Central journal article supplement (PMC4210970; doi:10.3390/ijerph111010105), 2014-09-29

## Enteric Pathogen Survival Varies Substantially in Irrigation Water from Belgian Lettuce Producers

**Figure S1.** Survival of *Salmonella* Typhimurium MB4880 (▲), *Salmonella* Thompson RM1987N (▼), *E. coli* O157:H7 MB3885 (□) and *E. coli* O157:H7 NCTC12900 (○) in untreated irrigation water stored at 20 °C. Pathogen suspensions (A) Groundwater 1, (B) Groundwater 2, (C) Pond Water 1. The data show the mean of triplicate samples and are calculated from the log-transformed values of the pathogen population size. Error bars indicate standard deviations. Different letters indicate significant difference according to negative binomial regression ( $p < 0.05$ ).

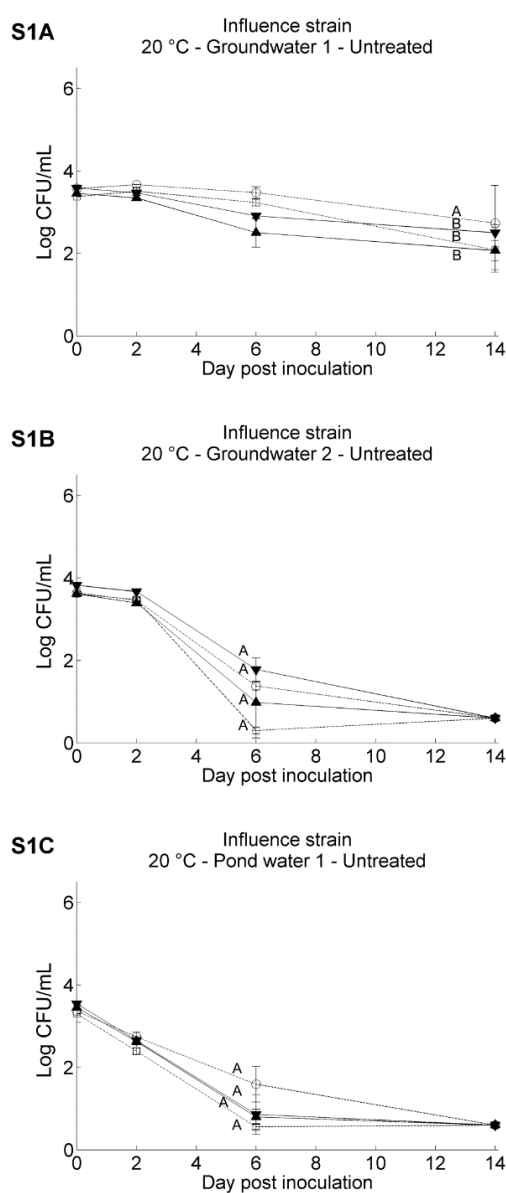

Supplement: ijerph-11-10105-s001.pdf [file ijerph-11-10105-s001.pdf]
